# Supplementary material
Source: Research Square preprint supplement (doi:10.21203/rs.3.rs-9144413/v1)
Supplement: Supplementary file 1 [file 7a05f346b45e1a3b97bfeb8b.docx]

Supplementary Information

**Unified matrix-parallel outer-product updates for pretrained deployment and on-device adaptation**

*In-Seok Lee1†, Kyu-Ho Lee1,2†, Ryun-Han Koo1†, Jiseong Im1, Sung-Ho Park1, Jonghyun Ko1, Joon Hwang1, Sangwoo Ryu1,3, Kyung-Min Lee1,2, and Jong-Ho Lee1,**

1Department of Electrical and Computer Engineering and Inter-university Semiconductor Research Center, Seoul National University, Seoul 08826, Republic of Korea

2R&D center, Samsung Electronics, Hwasung 18448, Korea

3R&D, SK Hynix Inc, Icheon 17336, Republic of Korea

*† These authors contributed equally: In-Seok Lee, Kyu-Ho Lee, Ryun-Han Koo*

** Corresponding author (e-mail: jhl@snu.ac.kr)*

***Keywords****: On-device Learning, Low-rank Decomposition, Field-effect transistor, Weight initialization, Bidirectional weight update, NOR-type array*

**Contents**

Supplementary Figure 1–19

Supplementary Table 1

Supplementary Note 1–5

**Supplementary Figures**

**Supplementary Figure 1. Forward and backward current-summation paths in different array configurations.** **a** NOR-type array. **b** AND-type array. **c** NAND-type array. **d** decoupled-gate charge-trap flash based NOR-type array. The comparison highlights how the NOR line organization supports bidirectional current summation for forward VMM with ***W*** and backward VMM with ***W*ᵀ**, whereas string-based AND/NAND configurations constrain current routing.

**Supplementary Figure 2. Output characteristics of the DCGFET.** Drain current (*I*D) is plotted versus drain-to-source voltage (*V*DS) for *V*PG = 0.0–2.0 V (step 0.1 V) at *V*AG = 2.0 V (*L*AG = 0.6 μm, *L*PG = 1.0 μm, *W*ch = 1.0 μm). The curves show program-gate-dependent current levels with saturation, supporting stable readout for array operation.

**Supplementary Figure 3. Selective update verification in a DCGFET array.** **a** Conductance change (**Δ*G***) versus cell index under program pulses (***V*PGM = 8 V, *t*p = 1 ms**) for ***N*p = 1, 10, 50** with selected and unselected PG/SL conditions. **b** Corresponding selective erase results under erase pulses (***V*ERS = −8 V, *t*p = 1 ms**) for ***N*p = 1, 10, 50**. Only the fully selected cell shows appreciable **ΔG**, indicating suppressed disturb under repeated updates.

**Supplementary Figure 4.** **Potentiation and depression characteristics captured by transfer curves.** **a** *I*D–*V*AG curves after successive erase pulses (***V*ERS = −8.5 V, *t*ERS = 1 ms**, 50 pulses). **b** *I*D–*V*AG curves after successive program pulses (***V*PGM = 5.5 V, *t*PGM = 100 μs,** 50 pulses). These results illustrate bidirectional conductance modulation and the usable operating window for analog weight updates.

**Supplementary Figure 5.** **LTP LTD characteristics of DCGFET. a** *I*D versus pulse number during alternating erase and program operations for *V*PG = 0.2 V. **b** *I*D versus pulse number during alternating erase and program operations for *V*PG = 1.0 V.Measured at *V*DS = 1 V and *V*AG = 3 V using erase pulses (*V*ERS = −9.5 V, *t*ERS = 1 ms) and program pulses (*V*PGM = 6.5 V, *t*PGM = 100 μs). These results show the effect of read bias on the current window.

**Supplementary Figure 6. Verification of current summation on a source line.** **a** *I*SL–*V*AG curves for four devices at *V*PG = 1 V and *V*DS = 1 V. **b** Comparison between the measured total line current (*I*SL,Total) and the arithmetic sum (*I*Sum). **c** Stacked contributions and comparison at *V*AG = 2.5 V (*V*PG = 1.0 V, *V*DS = 1.0 V). The agreement validates analog current summation used for VMM.

**Supplementary Figure 7. Verification of current summation using eight devices in the opposite direction.** **a** *I*BL–*V*AG for eight devices at *V*PG = 1 V and *V*DS = 1 V. **b** Comparison between measured total bit-line current (*I*BL,Total) and summed current (*I*Sum). **c** Agreement at *V*AG = 2.5 V (*V*PG = 1.0 V, *V*DS = 1.0 V). This supports bidirectional current summation needed for transpose-mode operations.

**Supplementary Figure 8. Outer-product programming fidelity for a representative target pattern. a** Target and measured conductance maps after a matrix-parallel update. **b** Measured conductance versus target conductance with 1σ and 2σ variation bands. The point-wise comparison quantifies programming accuracy for the array-parallel update operation.

**Supplementary Figure 9. Additional pattern-transfer example for matrix-parallel programming.** **a** Target and measured conductance maps for a rank-2 letter-shaped pattern. **b** Measured versus target conductance with 1σ and 2σ variation bands. This provides another view of pattern-transfer fidelity under the same array-parallel update scheme.

**Supplementary Figure 10. Measured PWM output waveforms for different membrane voltages.** Output voltage is plotted versus time while *V*Mem is swept from 0.5 to 2.5 V. The monotonic change in pulse width provides the time-domain encoding used in propagation and update signaling.

**Supplementary Figure 11. Effect of update-vector quantization resolution on learning. a** Classification accuracy versus training epoch for quantization levels from 1 to 6 bits (quantize level *N*Q). **b** Maximum accuracy versus quantized bits, showing saturation beyond *N*Q > 4 bits. The result motivates the quantization setting used for the time-domain update engine.

**Supplementary Figure 12. Device-to-device spread in erase-driven conductance update.** Conductance is plotted versus pulse number under erase pulses (*V*ERS = −7 V, *t*p = 100 ms) measured at *V*PG = 2.5 V, *V*AG = 3.0 V, and *V*DS = 1.0 V. The distribution illustrates variability in update trajectories that informs the device-aware non-ideality model.

**Supplementary Figure 13. Scaling of weight-transfer latency with array size.** Relative latency normalized by *W*MAX is plotted versus array row size for row-by-row transfer and the proposed matrix-parallel scheme (rank = 20).The proposed scheme keeps transfer latency nearly constant with array size because it is set by the number of parallel update cycles rather than the number of individually addressed cells.

**Supplementary Figure 14. Training-latency counting for conventional row-by-row weight updates.** An *m*×*m* array is updated sequentially by sweeping rows in a program (PGM) phase and an erase (ERS) phase, so the per-sample training latency scales as :
*T*train,conv=2 *m* *W*MAX,

where *W*MAX is the maximum admitted pulse width per update phase. This illustrates that conventional in-array learning incurs a latency that grows linearly with array dimension.

**Supplementary Figure 15. Training-latency counting for matrix-parallel outer-product updates.** For an outer-product update Δ*W*∝*x* *y*T, the full m×*m* conductance matrix is updated in a fixed number of array-level update cycles by applying row and column waveforms in parallel, resulting in *T*train,prop=4 *W*MAX. Relative to the row-by-row baseline, the latency ratio becomes *T*train,prop/*T*train,conv​=2/*m*, showing that the proposed update primitive removes the linear dependence on *m*.

**Supplementary Figure 16. Transfer-latency counting for conventional row-by-row weight import.** In the conventional workflow, pretrained weight import is performed by sequential programming across rows with separate PGM and ERS phases, giving *T*transfer,conv=2 *m* *W*MAX​.
This indicates that the weight-loading overhead scales directly with array size even before fine-tuning starts.

**Supplementary Figure 17. Transfer-latency counting for low-rank outer-product weight import in the proposed scheme.** When a pretrained weight matrix is imported as a sum of rank-1 outer products, the transfer latency is set by the number of low-rank update cycles rather than the number of rows, giving
*T*transfer,prop = 2 *r* *W*MAX ​,
where *r* is the number of singular components used for import. The resulting ratio *T*transfer,prop/*T*transfer,conv=*r*/*m* shows that low-rank import becomes increasingly advantageous as array size grows.

**Supplementary Figure 18. Capacitance-based update-energy model for conventional row-by-row programming.** The update energy is estimated by summing the capacitive charging cost of device nodes and interconnect lines during sequential row updates, yielding
*E*row-by-row = *m*×[ *m* *C*DCGFET *V*PGM2  +  *m*(*m*−1) *C*DCGFET(*V*PGM−*V*INH)2  + *m* *C*WL*V*PGM2  +  (*m*−1) *C*SL*V*INH2 ].
Here *C*DCGFET ​is the effective device gate capacitance, and *C*WL and *C*SL are the word-line and source-line capacitances. The ***m* device gate capacitors** in the programmed row are charged/discharged with a voltage swing of *V*PGM, whereas the ***m*(*m*−1) inhibited cells** are charged/discharged with a reduced swing of *V*PGM−*V*INH. Meanwhile, the **WL** and **SL** capacitors are also charged/discharged with program and inhibition voltage, respectively. This model highlights that repeated interconnect charging in row-sequential updates becomes a dominant energy cost as *m* increases.

**Supplementary Figure 19. Capacitance-based update-energy model for matrix-parallel outer-product programming in the proposed scheme.** The update energy is written in terms of the admitted pulse count during array-parallel programming and the interconnect charging per quantization period, yielding

with *n*i=*N*Q (*y*i/*T*SL), where *N*Q is the quantization level and *n*i represents the admitted number of PG pulses under the non-inhibited window *y*i ​within one SL period *T*SL​. The device gate capacitors in the i th row are charged/discharged **​** times with a voltage swing of *V*PGM​ and times with a reduced swing of *V*PGM−*V*INH​. In parallel, the **WL** and **SL** capacitances are charged/discharged **​** times to the *V*PGM​ level and once to the *V*INH​​ level, respectively. This formulation separates the energy contribution from active and inhibited intervals and provides a direct way to compare matrix-parallel and row-by-row update energy under the same voltage and capacitance assumptions.

**Supplementary Note 1. Architecture specific feasibility of bidirectional current summation and hardware backpropagation**

Figure 1f uses O, △, and X to classify operation feasibility under baseline array operation. O means natively supported. △ means conditionally feasible with added architecture or operation support. X means not generally supported in baseline operation.

NOR type arrays allow direct cell access at line intersections. Current summation can be formed in both directions by exchanging drive and sensing lines. This supports forward propagation with *W* and backward propagation with *W*T in the same topology. For this reason NOR is classified as O for bidirectional current summation and hardware backpropagation.

AND type arrays rely on string-based series conduction with shared internal nodes and select devices. This structure restricts reverse direction current collection and transpose equivalent signal flow in baseline operation. Practical bidirectional current summation and direct hardware backpropagation are therefore not generally supported without major added circuitry. For this reason AND is classified as X for both items.

NAND type arrays also use series strings, so bidirectional current summation and hardware backpropagation are not native in conventional operation. Prior studies showed that these functions can be demonstrated when modified routing, separated pathways, or partitioned forward and backward arrays are introduced [SN1,SN2]. These results establish feasibility, but they also show that the capability depends on added architecture and operation constraints and is not universally available in baseline string operation [SN1,SN2,SN3]. For this reason NAND is classified as △ for both items.

The decoupled gate charge trap flash based NOR array keeps NOR line topology, so bidirectional summation and transpose related signal flow remain directly available at array level. The decoupled gate structure separates access control from state storage and improves selective update control during repeated learning cycles. This supports stable bidirectional operation with practical update selectivity in the same array framework. For this reason the decoupled gate NOR array is classified as O for bidirectional current summation and hardware backpropagation.

[SN1] Novel Method Enabling Forward and Backward Propagations in NAND Flash Memory for On Chip Learning. 2021. DOI 10.1109/TED.2021.3081610

[SN2] Neuromorphic Computing Using Random Synaptic Feedback Weights for Error Backpropagation in NAND Flash Memory Based Synaptic Devices. 2023. DOI 10.1109/TED.2023.3237670

[SN3] Operation Scheme of Multi Layer Neural Networks Using NAND Flash Memory as High Density Synaptic Devices. 2019. DOI 10.1109/JEDS.2019.2947316

**Supplementary Note 2. Time-domain outer-product update primitive**

This work implements an array-parallel outer-product update by encoding one update vector on program-gate (PG) lines and the other on source-line (SL) inhibition waveforms. For a rank-1 update Δ*W* = *x* *y*T, the element *x*i is encoded as the PG pulse width *t*PG,i within a maximum update window *W*MAX, while *y*j is encoded as the duration of a non-inhibited SL window *y*j within one SL period *T*SL. The remaining portion of the SL period biases the line to an inhibition voltage *V*INH that suppresses unintended programming.

To control update resolution, *y*j is quantized into *N*Q discrete levels and *T*SL is set to satisfy
*T*SL = *N*Q *T*PG, (S1)
where *T*PG is the period of PG pulses. The SL window *y*j determines how many PG pulses are admitted within one SL period. We denote the admitted pulse count as *n*j, which can be written in normalized form as
*n*j = *N*Q × (*y*j / *T*SL), with 0 ≤ *n*j ≤ *N*Q. (S2)
The effective admitted update duration for cell (*i*,*j*) becomes
*t*eff,ij = *n*j × *t*PG,i. (S3)

Because the device conductance change depends mainly on the accumulated admitted update duration (see Supplementary Note 3), the conductance update follows
Δ*G*ij ∝ *t*eff,ij ∝ *x*i *y*j, (S4)
which realizes an outer-product update directly on the array without converting it into sequential cell-wise programming commands. Positive and negative conductance changes are applied using separate erase and program phases, respectively, under the same waveform format.

For gradient-based updates with bipolar vectors, the signed outer product can be implemented using a four-quadrant decomposition
*x* = *x*+ − *x*−, *y* = *y*+ − *y*−, (S5)
Δ*W* = *x* *y*T = *x*+ *y*+T + *x*− *y*−T − *x*+ *y*−T − *x*− *y*+T. (S6)
Each term in (S6) is a non-negative outer product that can be executed by one array-parallel update cycle, so the same pulse primitive supports both low-rank weight import and gradient-based fine-tuning.

**Supplementary Note 3. Device-aware simulation framework and non-ideality model**

System-level evaluation uses device-aware simulations that incorporate measured conductance-update characteristics and variability. Device-to-device variability is modeled as a distribution in conductance update and readout response, parameterized by σ/μ (Supplementary Figure 12). Read-path asymmetry are included by applying separate forward and backward conductance mappings when computing VMM outputs (Fig. 2d). Low-rank weight import is performed by truncating the SVD to rank *r* and applying *r* outer-product update cycles per layer, followed by gradient-based fine-tuning using the same outer-product update primitive with the same update constraints.

Layer mapping, update quantization, and learning schedules are kept consistent with the array-level operation. The simulation uses the same rank range evaluated in Fig. 5c and the same variability range evaluated in Fig. 5b.

**Supplementary Note 4. Latency model for transfer and training updates**

We estimate transfer and training latencies by counting the number of array update cycles and multiplying by the maximum admitted update duration per cycle, *W*MAX, which is set by the pulse-width window used in the time-domain update engine. In a conventional row-by-row scheme, each row update is applied sequentially and requires separate program and erase phases, leading to *T*conv=2 *m* *W*MAX for both weight import and per-sample training updates (Supplementary Figures 14 and 16).
In the proposed scheme, outer-product updates are applied in a matrix-parallel manner by driving row and column waveforms simultaneously, so the latency is determined by a fixed number of array-level cycles. For signed outer-product updates, the implementation shown uses four update cycles per training sample, giving *T*train,prop=4 *W*MAX (Supplementary Figure 15). For low-rank weight import, the number of required cycles is proportional to the rank *r*, giving *T*transfer,prop = 2*r* *W*MAX ​(Supplementary Figure 17). These relations yield the latency ratios *T*train,prop/*T*train,conv=2/*m* and *T*transfer,prop/*T*transfer,conv=*r*/*m*.

**Supplementary Note 5. Capacitance-based update-energy model**

We estimate update energy by summing capacitive charging costs on device nodes and interconnect lines under the applied update voltages. In the conventional row-by-row scheme, the update energy is expressed as :

*E*row-by-row = *m* × [ *m* *C*DCGFET *V*PGM2  +  *m*(*m*−1) *C*DCGFET(*V*PGM−*V*INH)2  + *m* *C*WL*V*PGM2  +  (*m*−1) *C*SL*V*INH2 ]. (S7)
Here *C*DCGFET ​is the effective device gate capacitance, and *C*WL and *C*SL are the word-line and source-line capacitances. This model highlights that repeated interconnect charging in row-sequential updates becomes a dominant energy cost as *m* increases.This expression corresponds to Supplementary Figure 18.

(S8)

with *n*i=*N*Q (*y*i/*T*SL). Here *N*Q is the quantization level and *n*i represents the admitted number of PG pulses under the non-inhibited window *y*i ​within one SL period *T*SL​. These relations correspond to Supplementary Figure 19. Total training energy is obtained by multiplying the per-cycle energy by the number of transfer and training update cycles counted in Supplementary Note 3.

**Supplementary Table**

**Supplementary Table S1. Bias conditions for selective update.**
